## RESEARCH ARTICLE

# Mode of action of a *Drosophila* FMRFamide in inducing muscle contraction

Maja Milakovic<sup>1</sup>, Kiel G. Ormerod<sup>1</sup>, Markus K. Klose<sup>2</sup> and A. Joffre Mercier<sup>1,\*</sup>**ABSTRACT**

*Drosophila melanogaster* is a model system for examining the mechanisms of action of neuropeptides. DPKQDFMRamide was previously shown to induce contractions in *Drosophila* body wall muscle fibres in a Ca<sup>2+</sup>-dependent manner. The present study examined the possible involvement of a G-protein-coupled receptor and second messengers in mediating this myotropic effect after removal of the central nervous system. DPKQDFMRamide-induced contractions were reduced by 70% and 90%, respectively, in larvae with reduced expression of the *Drosophila* Fmr receptor (FR) either ubiquitously or specifically in muscle tissue, compared with the response in control larvae in which expression was not manipulated. No such effect occurred in larvae with reduced expression of this gene only in neurons. The myogenic effects of DPKQDFMRamide do not appear to be mediated through either of the two *Drosophila* myosuppressin receptors (*DmsR-1* and *DmsR-2*). DPKQDFMRamide-induced contractions were not reduced in Ala1 transgenic flies lacking activity of calcium/calmodulin-dependent protein kinase (CamKII), and were not affected by the CaMKII inhibitor KN-93. Peptide-induced contractions in the mutants of the phospholipase C-β (*PLCβ*) gene (*norpa* larvae) and in IP<sub>3</sub> receptor mutants were similar to contractions elicited in control larvae. The peptide failed to increase cAMP and cGMP levels in *Drosophila* body wall muscles. Peptide-induced contractions were not potentiated by 3-isobutyl-1-methylxanthine, a phosphodiesterase inhibitor, and were not antagonized by inhibitors of cAMP-dependent or cGMP-dependent protein kinases. Additionally, exogenous application of arachidonic acid failed to induce myogenic contractions. Thus, DPKQDFMRamide induces contractions via a G-protein coupled FMRFamide receptor in muscle cells but does not appear to act via cAMP, cGMP, IP<sub>3</sub>, PLC, CaMKII or arachidonic acid.

**KEY WORDS:** FMRFamide, G-protein coupled receptor, cAMP, cGMP, CaMKII, neuropeptide

**INTRODUCTION**

Neuropeptides usually elicit physiological responses via G-protein-coupled receptors (GPCRs) which, in turn, act through second messenger pathways (Mercier et al., 2007; Meeusen et al., 2003; Vauquelin and von Mentzer, 2007). Many 'RFamide' peptides (i.e. containing Arg-Phe-NH<sub>2</sub> at the carboxyl terminus) have been shown to act via GPCRs (e.g. van Tol-Steye et al., 1999; Volterra and Siegelbaum, 1988; Wang et al., 1995), although molluscs contain a sodium channel that is directly gated by FMRFamide (Cottrell, 1997;

Lingueglia et al., 1995). There is considerable interest in identifying the GPCRs that mediate the effects of RFamide peptides and the intracellular messengers that mediate their physiological effects.

Early studies demonstrated the involvement of GPCRs using pharmacological evidence, such as sensitivity to non-hydrolysable GTP analogues or to pertussis and cholera toxins, but more recent studies have identified peptide-activated GPCRs using genetic approaches, comparing genomes and transcriptomes with sequences encoding known GPCRs. The *Drosophila* genome contains ~44 genes encoding peptide-binding GPCRs (Hewes and Taghert, 2001; Brody and Cravchik, 2000), and several of these have been functionally characterized in cell cultures, usually Chinese hamster ovary cells. Four of these genes encode GPCRs that are activated by RFamide peptides. Only one of these GPCRs, referred to as 'FR' (encoded in gene *CG2114*), was reported to bind with high affinity to *Drosophila* peptides containing the sequence 'FMRFamide', and this gene product was less sensitive to other RFamide peptides (Meeusen et al., 2002; Cazzamali and Grimmelikhuijzen, 2002). This GPCR is a good candidate for mediating the physiological effects of *Drosophila* FMRFamides, and its involvement in mediating physiological responses needs to be tested more thoroughly using *Drosophila* cells or tissues.

DPKQDFMRamide is the most abundant of eight peptides encoded in the *dFMRFamide* gene (Nambu et al., 1988; Schneider and Taghert, 1988) and is localized in neurohemal sites in fly larvae (Wegener et al., 2006). This peptide enhances nerve-evoked muscle contractions and synaptic transmission at neuromuscular junctions (Hewes et al., 1998; Dunn and Mercier, 2005). DPKQDFMRamide increases the amount of transmitter released from nerve terminals (Hewes et al., 1998; Klose et al., 2010), and it also increases the amplitude of nerve-evoked calcium signals via release of calcium from intracellular stores (Klose et al., 2010). The enhancement of synaptic transmission requires calcium/calmodulin-dependent protein kinase (CaMKII) (Dunn and Mercier, 2005) and involves the FR GPCR (Klose et al., 2010). The intracellular pathways mediating the peptide-induced contractions, however, have not been studied, and possible involvement of the FR GPCR has not been investigated.

Earlier work demonstrated that DPKQDFMRamide also elicits contractions in muscle fibres of the *Drosophila* larval body wall in the absence of the CNS (Clark et al., 2008). This effect appeared to involve a direct action on muscle fibres, as the peptide induced muscle contractions even after glutamate receptors on the muscle fibres were desensitized, which would prevent activation by increasing spontaneous release of glutamate from presynaptic terminals (Clark et al., 2008). However, other neurotransmitters, such as pituitary adenylate cyclase-activating polypeptide (PACAP), octopamine, proctolin and insulin-like peptide (ILP), are present in synaptic boutons on the larval body wall muscles (Anderson et al., 1988; Gorczyca et al., 1993; Monastirioti et al., 1995; Zhong and Peña, 1995). Thus, a possible presynaptic action of the peptide, through release of these other substances, was not ruled out.

<sup>1</sup>Department of Biological Sciences, Brock University, 500 Glenridge Avenue, St Catharines, ON, Canada, L2S 3A1. <sup>2</sup>Department of Anatomy & Neurobiology, Washington University, St Louis, MO 63110, USA.

\*Author for correspondence (amercier@brocku.ca)

The present investigation was aimed at identifying the receptor and second messenger pathways mediating DPKQDFMRamide-induced contractions in *Drosophila* larval body wall muscles and determining whether the receptor was localized presynaptically or postsynaptically. We used RNA interference (RNAi) to test the hypothesis that DPKQDFMRamide acts via FR to elicit contractions. Our data indicate that the peptide-induced contractions require the presence of the FR in muscle fibres. We also used genetic and pharmacological methods to investigate second messengers underlying peptide-induced contractions.

## RESULTS

As in previous experiments (Clark et al., 2008), DPKQDFMRamide induced slow contractions lasting up to 5 min (Fig. 1). To quantify this effect (an increase in muscle tonus), the

tonus during a 5 min pre-peptide period (basal tonus) was subtracted from the maximal contraction observed during 5 min of peptide application. Responses are reported as mean tonus change  $\pm$  s.e.m. We also observed spontaneous phasic contractions in both the presence and absence of DPKQDFMRamide, as reported previously (Clark et al., 2008). As our earlier studies indicated that the frequency and amplitude of such phasic contractions do not correlate with peptide concentration (Clark et al., 2008), we did not examine these contractions further.

### FMRamide G-protein coupled receptor (FR)

To investigate whether the GPCR encoded by the *Drosophila* FR gene plays a role in mediating the effects of DPKQDFMRamide on muscle tonus, RNAi was used to reduce expression of this gene in *Drosophila* larvae (Dietzl et al., 2007). We obtained homozygous

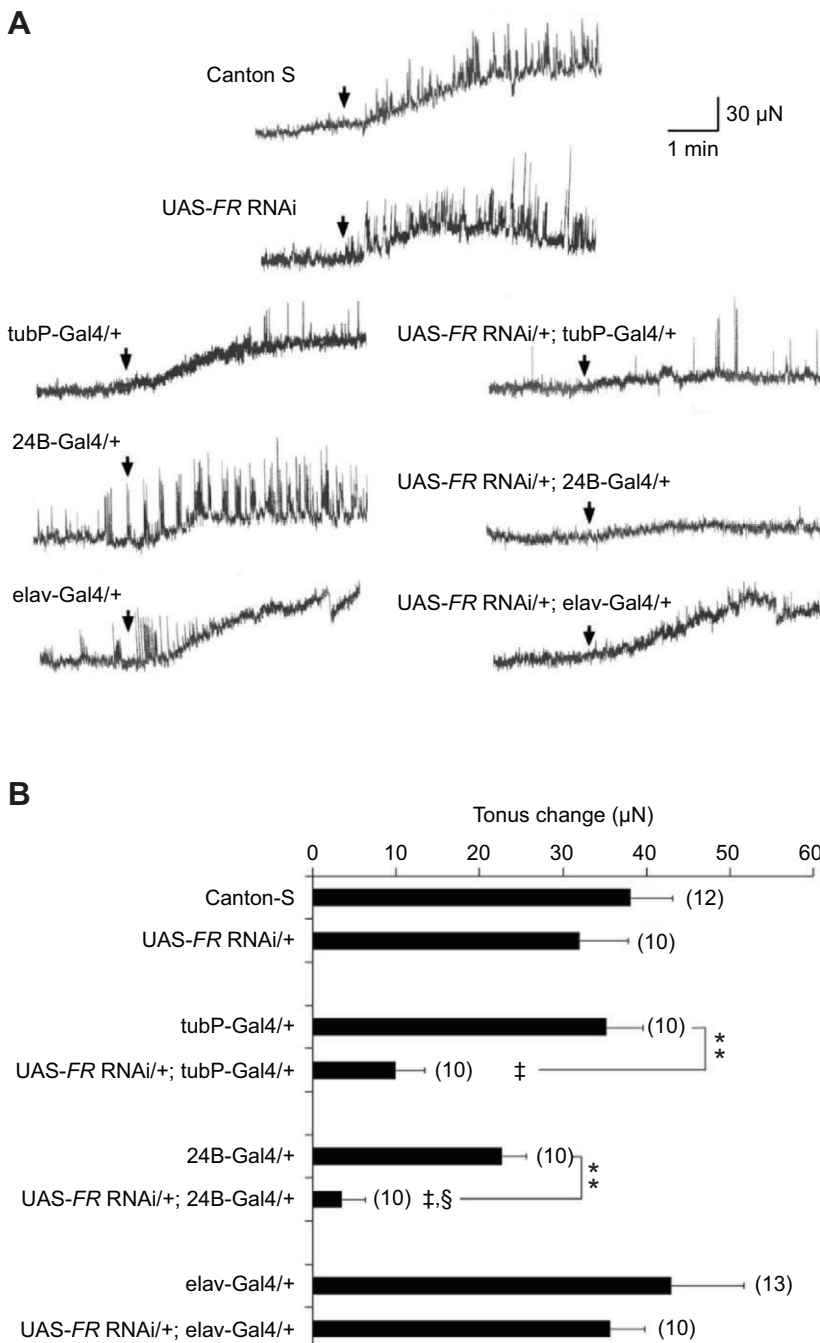

**Fig. 1. DPKQDFMRamide modulates larval muscle tonus via the *Drosophila* FMRamide G-protein-coupled receptor (FR).** (A) Sample traces of larval body wall muscle contractions in response to application of  $1 \mu\text{mol l}^{-1}$  DPKQDFMRamide. The recordings from different genetic fly lines are shown in the following order (from top left): Canton S, UAS-FR RNAi/+ (a line containing a single copy of non-activated FR inverted repeat construct: FR-IR), tubP-Gal4/+ (a line containing a single copy of the ubiquitous Gal4 driver), 24B-Gal4/+ (a line containing a single copy of the muscle-specific Gal4 driver), elav-Gal4/+ (a line containing a single copy of the neuron-specific Gal4 driver), UAS-FR RNAi/+; tubP-GAL4/+ (a line containing a single copy of both the ubiquitous Gal4 driver and FR-IR construct), UAS-FR RNAi/+; 24B-GAL4/+ (a line containing both a single copy of the muscle-specific Gal4 driver and FR-IR construct) and UAS-FR RNAi/+; elav-GAL4/+ (a line containing both a single copy of the neuron-specific Gal4 driver and FR-IR construct). Peptide was applied for 5 min, beginning at the arrow mark and continuing to the end of the sample recording. Upward deflections represent phasic contractions. Inclines in the horizontal trace represent a change in muscle tonus. (B) Summary of responses to  $1 \mu\text{mol l}^{-1}$  DPKQDFMRamide. Peptide-induced muscle contractions were attenuated in larvae with the ubiquitous expression of FR-IR construct, UAS-FR RNAi/+; tubP-GAL4/+ larvae, but not in heterozygous parental control lines (Tamhane's *post hoc*,  $P < 0.01$ ). Similarly, larvae expressing the FR-IR construct specifically in muscle tissue showed a reduced response to the peptide (by ~85–90%) when compared with two heterozygous parental control lines (Tamhane's *post hoc*,  $P < 0.01$ ). Pan-neuronal expression of the FR-IR construct in *Drosophila* larvae had no effect on the peptide's ability to modulate muscle tonus. No differences were found between the response of UAS-FR RNAi/+; elav-GAL4/+ larvae and their parental controls (UAS one-way ANOVA, Tamhane's *post hoc*,  $P > 0.05$ ). \*Significant difference ( $P < 0.05$ ) from Canton-S flies. ‡Significant difference ( $P < 0.05$ ) from UAS-IR-FR line. Numbers in parentheses indicate the number of preparations.

transgenic flies carrying an *FR* inverted repeat (*FR-IR*) under the control of an upstream activating sequence (*UAS*). To express the RNAi and knockdown *FR* expression, these flies were crossed with flies that exhibit ubiquitous expression of *GAL4* homozygously under the control of the tubulin promoter (*tubP-GAL4*). The progeny (*UAS-FR RNAi/+*; *tubP-GAL4/+*) exhibited a significantly lower increase in muscle tonus in response to  $1 \mu\text{mol l}^{-1}$  DPKQDFMRamide compared with control lines (Fig. 1). Muscle tonus increased by only  $9.86 \pm 3.45 \mu\text{N}$  in these larvae, which was  $\sim 30\%$  of the response elicited in both parental control lines (*tubP-GAL4/+* genotype and *UAS-FR RNAi/+* genotype; one-way ANOVA, Tamhane's *post hoc*,  $P < 0.01$ ) and only 26% of the response in Canton-S larvae (one-way ANOVA, Tamhane's *post hoc*,  $P < 0.05$ ). No difference was observed between DPKQDFMRamide-induced contractions of the two parental control lines (Tamhane's *post hoc*,  $P > 0.05$ ), or between the parental control lines and Canton-S larvae (Tamhane's *post hoc*,  $P > 0.05$ ), in which expression of the *FR* gene was not manipulated. Thus, combining the *UAS-FR RNAi* line with *GAL4* to ubiquitously disrupt function of the *FR* was successful at inhibiting the peptide's ability to elicit contraction. Quantitative polymerase chain reaction (qPCR) showed that the ubiquitous *FR* knockdown line exhibited the most dramatic reduction,  $\sim 90\%$  reduction in transcript levels compared with Canton S and outcross controls (Fig. 2). These results suggest that the *FR* is at least partially responsible for mediating the myostimulatory effect of the peptide on larval body wall muscles.

To reduce *FR* expression specifically in muscle cells, *UAS-FR RNAi* flies were crossed with *24B-GAL4* flies, which express *Gal4* in all embryonic and larval somatic muscles (Schuster et al., 1996). This generated a heterozygous F1 generation, *UAS-FR RNAi/+*; *24B-GAL4/+*. To control for potential effects of P-element insertions present in all larvae, two control lines were used: (a) heterozygous *UAS-FR RNAi* flies with a non-active *UAS-FR-IR* construct and (b) heterozygous *24B-GAL4* lines containing a *Gal4* vector only. Peptide-induced contractions in larvae with RNAi-regulated expression of the *FR* gene (*UAS-FR RNAi/+*; *24B-GAL4/+*) in muscle cells were only 11% and 15% of the amplitude observed in *UAS-FR RNAi* and *24B-GAL4* controls, respectively (Fig. 1, Tamhane's *post hoc*,  $P < 0.05$  and  $P < 0.01$ ), and only 9% of the amplitude observed in Canton-S larvae (Fig. 1, Tamhane's *post hoc*,  $P < 0.05$ ). Thus, reducing *FR* expression in muscle cells reduced responsiveness to the peptide by  $\sim 85\text{--}90\%$ . There was no difference between the peptide-induced body wall contraction of Canton-S, *UAS-FR RNAi* and *24B-GAL4* control larvae (Tamhane's *post hoc*,  $P > 0.05$ ). qPCR data from the muscle knockdown line demonstrated a substantial reduction in transcript levels, roughly 75% knockdown compared with controls. The results suggest that expression of *FR*

on muscle cells is necessary for most if not all of the peptide-induced contraction. These results also corroborate previously reported evidence that DPKQDFMRamide induces contractions via a postsynaptic action (Clark et al., 2008).

To rule out the possibility that the tonus change might be mediated by presynaptic actions of the peptide, we crossed *UAS-FR RNAi* flies with flies harbouring pan-neuronal *GAL4* expression of the *elav-Gal4* driver. The effects of  $1 \mu\text{mol l}^{-1}$  DPKQDFMRamide on the progeny (*UAS-FR RNAi/+*; *elav-GAL4/+*) were compared with effects on two control progeny lines (*UAS-FR RNAi/+* and *elav-GAL4/+*). The nerve-specific driver was able to reduce transcript levels by  $\sim 60\%$  relative to controls. The peptide's effect in larvae with *FR-RNAi* and pan-neuronal expression of *Gal4* (*UAS-FR RNAi/+*; *elav-GAL4/+*) was similar to its effect in heterozygous control *elav-GAL4* (Fig. 1; Tamhane's *post hoc*,  $P > 0.05$ ) and *UAS-FR-IR* larvae (Fig. 1; Tamhane's *post hoc*,  $P > 0.05$ ) as well as to the effect in Canton-S larvae (Fig. 1; Tamhane's *post hoc*,  $P > 0.05$ ). Thus, pan-neuronal expression of the *FR-IR* construct had no effect on the ability of the peptide to increase muscle tonus.

### Dromyosuppressin GPCRs *DmsR-1* and *DmsR-2*

Presynaptic effects of DPKQDFMRamide are mediated by both *FR* and one of the two dromyosuppressin receptors (*DmsR-2* but not *DmsR-1*) (Klose et al., 2010). To investigate the potential involvement of the *Drosophila* myosuppressin receptors, homozygous transgenic flies carrying an inverted repeat for *DmsR-1* and *DmsR-2* under the control of *UAS* (*UAS-DmsR-1 RNAi* and *UAS-DmsR-2 RNAi*) were crossed with the same three drivers as *FR* (*tubPGal4*, *24B-Gal4* and *elavGal4*) as well as the appropriate outcross controls. Responses of larval progeny of these genetic crosses to  $1 \mu\text{mol l}^{-1}$  DPKQDFMRamide did not display any significant deviations from control lines (Fig. 3). We confirmed the reduction of expression for both myosuppressin receptors using qPCR. Data for *DmsR-1* are as follows: *UAS-DmsR-1 RNAi/+*; *24B-Gal4/+* had 46% expression relative to wild-type, *UAS-DmsR-1 RNAi/+*; *elav-Gal4/+* had 61% expression relative to wild-type, and *UAS-DmsR-1 RNAi/+*; *tubP-Gal4/+* had 38% expression relative to wild-type. Data for expression of *DmsR-2* relative to wild-type are as follows: *UAS-DmsR-2 RNAi/+*; *24B-Gal4/+* 51%, *UAS-DmsR-2 RNAi/+*; *elav-Gal4/+* 65%, and *UAS-DmsR-2 RNAi/+*; *tubP-Gal4/+* 38%.

### CaMKII

The results presented above strongly suggest that the effect of DPKQDFMRamide on muscle tonus is mediated via *FR* GPCRs localized in muscle fibres. As the ability of DPKQDFMRamide to increase neurotransmitter release from synaptic terminals involves

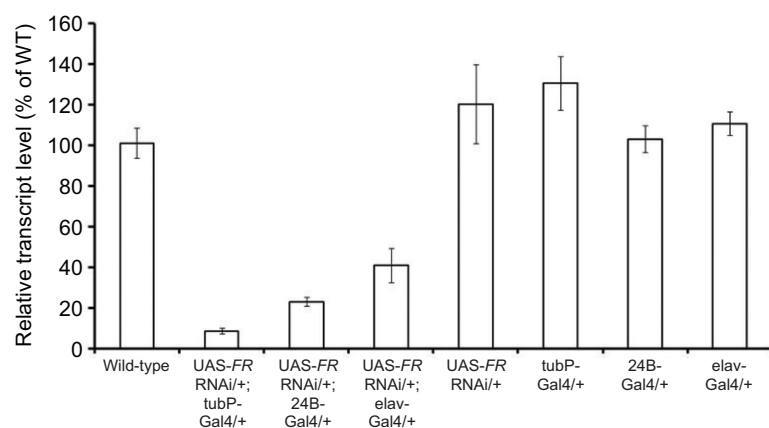

**Fig. 2. Confirmation of *UAS-RNAi*-*FR*amide knockdown using real-time quantitative (q)PCR.** RNA was isolated from whole third-instar larvae tissue from each of the transgenic lines used to knockdown the expression of *FR* as well as the outcross controls. RNA was reverse-transcribed and, subsequently, cDNA levels were quantified using qPCR. The housekeeping gene ribosomal protein 49 was used for data normalization. WT, wild-type.



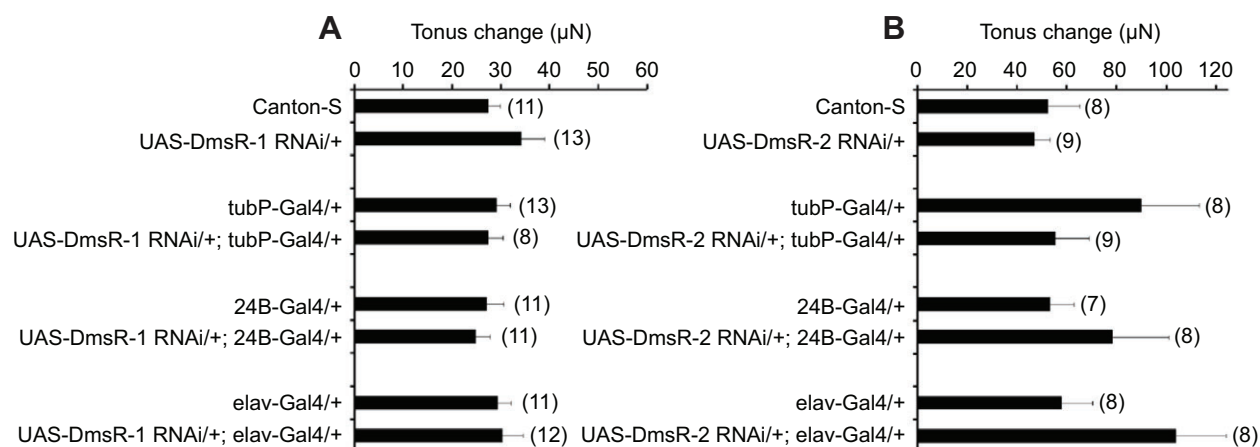

**Fig. 3. Myogenic effects of DPKQDFMRFamide are not mediated through dromyosuppressin receptor (DmsR) 1 or 2.** (A) Summary of responses to  $1 \mu\text{mol l}^{-1}$  DPKQDFMRFamide in UAS-DmsR-1 RNAi lines. Peptide-induced changes in basal tonus were equal to or greater in force than wild-type controls. (B) Summary of responses to  $1 \mu\text{mol l}^{-1}$  DPKQDFMRFamide in UAS-DmsR-2 RNAi lines. Peptide-induced changes in basal tonus were equal to or greater in force than wild-type controls. Numbers in parentheses indicate the number of preparations.

FR GPCRs in neurons (Klose et al., 2010) and requires CaMKII activity (Dunn and Mercier, 2005), we sought to determine whether peptide-induced contractions are also mediated by CaMKII. This question was addressed using pharmacological agents known to reduce CaMKII activity and a transgenic *Drosophila* line (ala1) that increases expression of the inhibitory peptide of CaMKII in response to heat shock (Griffith et al., 1993). We also used an additional transgenic line (UAS-ala), which enabled us to drive the expression of the inhibitory peptide of CaMKII using a muscle-specific driver (24B), independently of heat shock.

Contractions of body wall muscles were compared between ala1 larvae and a control line (UAS-ala, which contains the inserted gene for the inhibitory peptide but under the control of Gal4 rather than heat shock). In the absence of heat shock, ala1 and control larvae showed similar increases in muscle tonus in response to  $1 \mu\text{mol l}^{-1}$  DPKQDFMRFamide (Fig. 4; *t*-test,  $P > 0.05$ ). Hence, constitutive expression of the CaMKII inhibitory protein in ala1 larvae had no effect on the DPKQDFMRFamide-induced tonus change. Griffith et al. (Griffith et al., 1993) reported some expression of the alanine inhibitory peptide in ala1 flies at  $25^\circ\text{C}$  ( $1.9\text{--}3.9 \mu\text{mol l}^{-1}$ ) and there is probably some expression at room temperature ( $22^\circ\text{C}$ ), but well below  $\text{IC}_{50}$  ( $13 \mu\text{mol l}^{-1}$  in *Drosophila*). A 1 h heat shock ( $37^\circ\text{C}$ ) increases expression of the inhibitory peptide and decreases CaMKII activity by 90–100%. Exposing ala1 flies to an hour-long heat shock ( $37^\circ\text{C}$ , which has been shown to decrease CaMKII activity by 70–100%) (Griffith et al., 1993) did not reduce peptide-induced contractions in ala1 larvae but enhanced them by ~150% compared with non-heat-shocked ala1 larvae (*t*-test,  $P < 0.05$ ). Heat shock also increased peptide-induced contractions in control larvae (UAS-ala) by ~100% (*t*-test,  $P < 0.05$ ). There was no significant difference between the responses of heat-shocked ala1 and heat-shocked UAS-ala larvae (*t*-test,  $P > 0.05$ ). Driving the expression of the inhibitory peptide of CaMKII in muscle cells did not alter muscle responsiveness to exogenously applied DPKQDFMRFamide (Fig. 4; UAS-ala/24B-Gal4:  $23.9 \pm 2.3$ , UAS-ala/+ :  $24.5 \pm 5.4$ ,  $P > 0.05$ ). These results suggest that enhanced responsiveness to the peptide is attributable to the heat-shock treatment rather than to CaMKII inhibition, and that CaMKII inhibition does not antagonize the peptide's ability to induce muscle contraction.

A cell-permeable inhibitor of CaMKII activity, KN-93, was applied at a concentration of  $1 \mu\text{mol l}^{-1}$  for 20 min, and immediately

thereafter the preparation was exposed to a solution containing both  $1 \mu\text{mol l}^{-1}$  DPKQDFMRFamide and  $1 \mu\text{mol l}^{-1}$  KN-93. There was no significant difference between contractions elicited by DPKQDFMRFamide alone ( $29.1 \pm 9.6 \mu\text{N}$ ) or in the presence of KN-93 ( $25.8 \pm 3.3 \mu\text{N}$ ; *t*-test,  $P > 0.05$ ).

### IP<sub>3</sub> receptor and phospholipase C

Excitatory effects of RFamide peptides have been linked to phospholipase C (PLC) and the generation of IP<sub>3</sub> in *Lymnea stagnalis* (Willoughby et al., 1999) and *Helix aspersa* (Falconer et al., 1993). If DPKQDFMRFamide induces contractions via the PLC-IP<sub>3</sub> pathway, it would be predicted that such contractions would be attenuated or abolished by disrupting either PLC or IP<sub>3</sub> receptor activity. To test this, we took advantage of *Drosophila* fly lines in which either PLC or IP<sub>3</sub> receptor functionality are disturbed with mutations in genes (*norpa* and *Plc21C*) that encode PLCβ or in the single gene known to encode the IP<sub>3</sub> receptor, *itpr*, respectively.

Heterozygous IP<sub>3</sub> receptor mutant larvae (*Itpr-r83A<sup>05616</sup>*) exhibit ~50% reduction in IP<sub>3</sub> receptor transcript levels (Klose et al., 2010). Fig. 5A shows the averaged change in tonus of heterozygous IP<sub>3</sub> receptor mutants (*Itpr-r83A<sup>05616</sup>*) and wild-type larvae in response to DPKQDFMRFamide. The mutant larvae responded to the peptide with an average muscle tonus increase of  $27.74 \pm 2.87 \mu\text{N}$ , which was not significantly lower than the response elicited in wild-type larvae (*t*-test,  $P > 0.05$ ).

Several mutant lines with deficits in PLC activity were used. Each of the mutants (*w<sup>\*</sup> norpa<sup>33</sup>*, *w<sup>\*</sup> norpa<sup>36</sup>* and *norpa<sup>7</sup>*) carries a point mutation in the *norpa* gene induced by ethyl methanesulphonate mutagenesis on the Oregon-R line. PLC activity is reduced to ~1–1.5% of wild-type levels in *norpa<sup>33</sup>* and *norpa<sup>36</sup>* mutants (Pearn et al., 1996), and PLC activity in *norpa<sup>7</sup>* mutants is reduced to about 2–3% of normal levels (Inoue et al., 1988). We also used the *Plc21C* gene mutant *y<sup>1</sup> w<sup>1118</sup>*; *Plc21C<sup>A246</sup>*, which was produced using P element insertion mutagenesis. It has been reported that the *plc21C* gene encodes two transcripts, of which one is expressed in the adult head only and the other in adult head and body tissue throughout development (Shortridge et al., 1991), but exact levels of their expression in *y<sup>1</sup> w<sup>1118</sup>*; *Plc21C<sup>A246</sup>* mutant flies have not been reported. All the PLC mutants we examined showed an increase in muscle tonus in response to  $1 \mu\text{mol l}^{-1}$  DPKQDFMRFamide

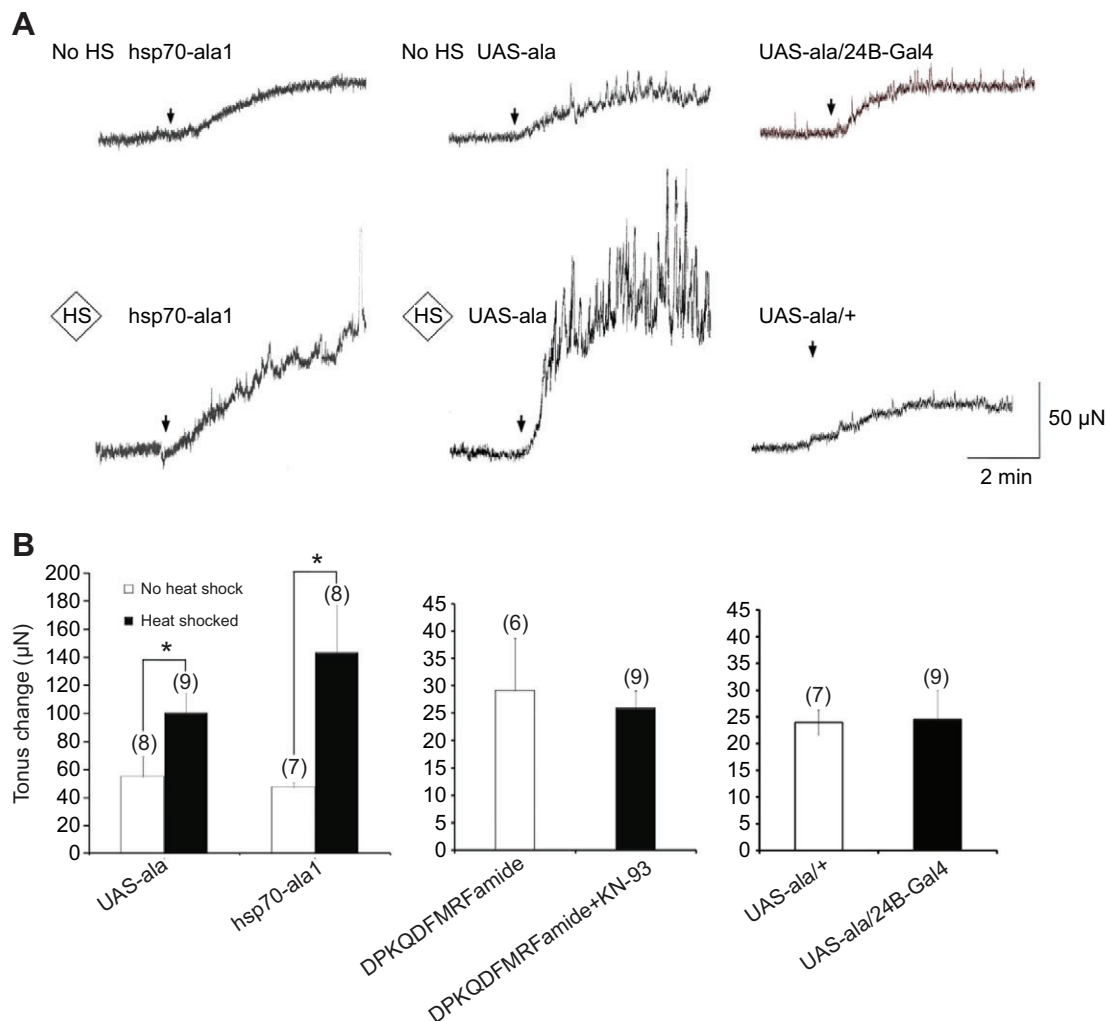

**Fig. 4. Genetic and pharmacological inhibition of CaMKII does not affect the ability of the DPKQDFMRamide to induce tonic contraction in *Drosophila* larval body wall muscles.** (A) Sample recordings demonstrate the effect of  $1 \mu\text{mol l}^{-1}$  DPKQDFMRamide on spontaneous tonic contractions of body wall muscles in ala1 (top left) and UAS-ala (top middle) larvae without prior heat-shock treatment, and ala1 (bottom left) and UAS-ala (bottom middle) after they were subjected to a 1 h heat-shock treatment at  $37^\circ\text{C}$ . Driving expression of ala peptide inhibitor in muscle tissue, independently of heat shock, did not attenuate the effects of DPKQDFMRamide (top right) or in the controls (bottom right). The peptide was applied at the downward pointing arrows by continuous perfusion. (B) Left: average muscle tonus change induced by DPKQDFMRamide in ala1 larvae and the control, UAS-ala larvae. Larvae of the two genetic lines showed similar increases in tonus in response to peptide treatment. Heat-shock treatment, which increases the expression of calcium/calmodulin-dependent protein kinase (CaMKII) inhibitory protein in ala1 flies, but not in UAS-ala flies, potentiated DPKQDFMRamide-induced contractions in both ala1 and UAS-ala larvae ( $t$ -test for independent samples,  $P < 0.05$ ). No significant difference was observed between the responses in heat-shocked ala1 and UAS-ala larvae ( $t$ -test for independent samples,  $P > 0.05$ ). Middle: average muscle tonus change induced by DPKQDFMRamide ( $1 \mu\text{mol l}^{-1}$ ) in Canton-S larvae in the presence of the CaMKII inhibitor KN-93 ( $1 \mu\text{mol l}^{-1}$ ). KN-93 had no effect on DPKQDFMRamide-induced muscle contractions ( $t$ -test for independent samples,  $P > 0.05$ ). Right: driving the expression of the ala peptide inhibitor selectively in muscle fibres (UAS-ala/24B-Gal4) did not alter the average muscle tonus change induced by DPKQDFMRamide or in control lines (UAS-ala/+) ( $t$ -test for independent samples,  $P > 0.05$ ). Numbers in parentheses indicate the number of preparations.

(Fig. 5B). Peptide-induced contractions in  $w^* \text{norpa}^{36}$ ,  $w^* \text{norpa}^{33}$  and  $\text{norpa}^7$  larvae were not significantly different from contractions in control (Oregon R) larvae and were not significantly different from each other (one-way ANOVA,  $P > 0.05$ ). Peptide-induced contractions were not significantly different between  $y^1 w^{1118}$ ;  $\text{Plc21C}^{A246}$  mutant larvae and  $y, w$  control larvae ( $t$ -test,  $P > 0.05$ ). These data do not support the hypothesis that either PLC or  $\text{IP}_3$  is involved in mediating myostimulatory effects of DPKQDFMRamide.

#### cAMP and cGMP

In other arthropods cAMP mediates peptide-induced muscle contractions by modulating  $\text{K}^+$  channels (Erxleben et al., 1995) and

$\text{Ca}^{2+}$  channels (Bishop et al., 1991; Bishop et al., 1987). As the ability of DPKQDFMRamide to induce contractions requires L-type  $\text{Ca}^{2+}$  channels (Clark et al., 2008), it seemed plausible that the peptide might activate  $\text{Ca}^{2+}$  channels via the cAMP pathway. To investigate whether cyclic nucleotide monophosphates are involved in mediating peptide-induced contractions, cAMP and cGMP levels in body wall muscles were determined with enzyme immunoassay after incubation in various peptide concentrations in the presence of 3-isobutyl-1-methylxanthine (IBMX), a phosphodiesterase inhibitor that slows the breakdown of cAMP and cGMP (Beavo et al., 1970; Beavo and Reifsnnyder 1990; Goy, 1990).

A 10 min exposure of body wall muscles to DPKQDFMRamide at concentrations ranging from  $10 \text{ nmol l}^{-1}$  to  $1 \mu\text{mol l}^{-1}$  in the

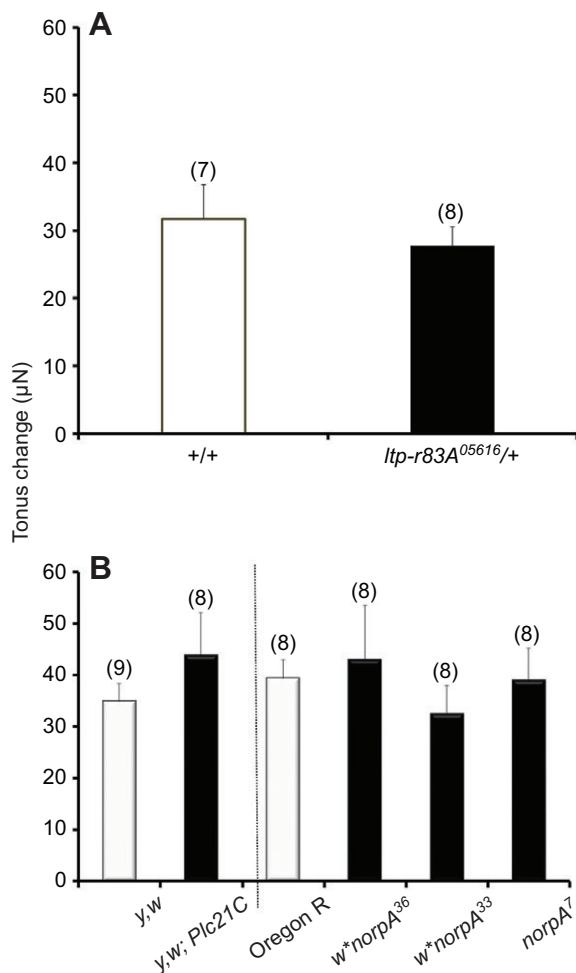

**Fig. 5. Disruption of PLC $\beta$  or IP $_3$  receptor gene had no effect on the ability of DPKQDFMRamide to modulate muscle tonus in *Drosophila* larvae.** Muscle contraction assays were performed on fly lines carrying mutation on the genes encoding (A) IP $_3$  receptor and (B) phospholipase C (PLC) $\beta$ . Muscle contraction assays were performed by perfusing body wall muscles with  $1 \mu\text{mol l}^{-1}$  DPKQDFMRamide for 5 min and recording the tonus change. The tonus change was calculated as the difference between the maximal rise in tonus within the 5 min peptide application period and the pre-peptide tonus level. (A) No significant difference was observed between the effect of the peptide on muscle tonus in heterozygous IP $_3$  receptor mutants (*ltp-r83A<sup>05616</sup>/+*) and wild-type larvae (*t*-test for independent samples,  $P>0.05$ ). Similarly, no significant difference was observed between the effects of the peptide on muscle tonus in each of *norpA* mutants (*w<sup>1</sup>norpA<sup>33</sup>*, *w<sup>1</sup>norpA<sup>36</sup>* and *norpA<sup>7</sup>*) and control Oregon R (*t*-test for independent samples,  $P>0.05$ ), or between *Plc21C* mutant (*y<sup>1</sup>w<sup>1118</sup>; Plc21C<sup>A246</sup>*) larvae and the control *y,w* (*t*-test for independent samples,  $P>0.05$ ). Numbers in parentheses indicate the number of preparations.

presence of  $0.5 \text{ mmol l}^{-1}$  IBMX did not significantly increase cAMP levels above the control level measured in IBMX alone (Fig. 6A, one-way ANOVA, Tamhane's *post hoc*,  $P>0.05$ ). There was also no significant difference between cAMP levels following the exposure of larval muscles to  $0.5 \text{ mmol l}^{-1}$  IBMX alone and saline alone (Fig. 6A, one-way ANOVA, Tamhane's *post hoc*,  $P>0.05$ ), which raised concern that this concentration of IBMX might not be sufficient to slow the breakdown of cAMP in *Drosophila* larval muscles. This same concentration of IBMX, however, potentiated the increases in cAMP induced by forskolin, an adenylate cyclase activator (Fig. 6B). Forskolin increased cAMP levels by ~230% compared with saline controls (one-way ANOVA, Tamhane's *post*

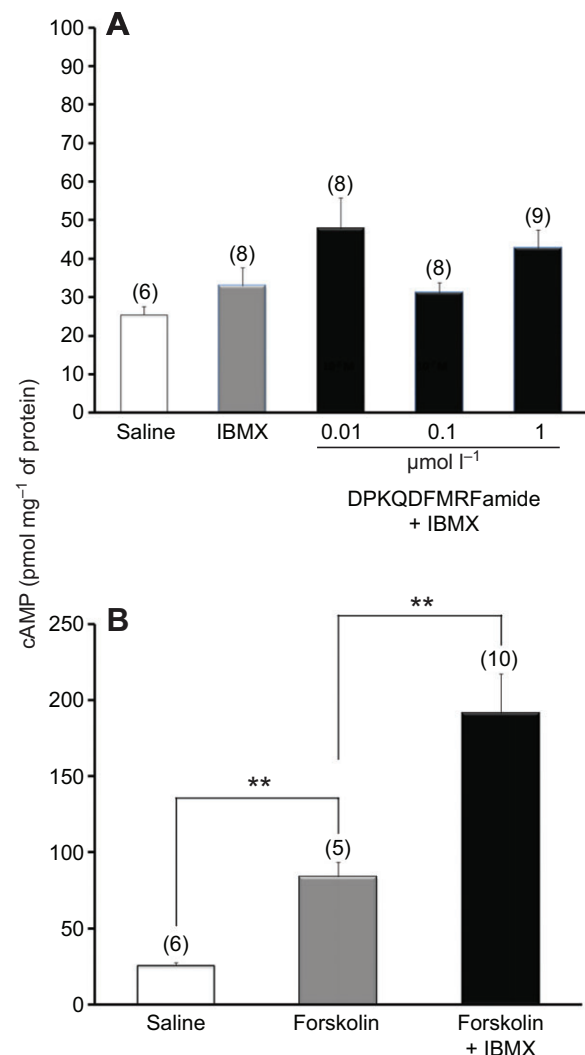

**Fig. 6. DPKQDFMRamide does not affect cAMP levels in *Drosophila* body wall muscles.** (A) The effects of DPKQDFMRamide on cAMP levels in larval body wall muscles in the presence of  $0.5 \text{ mmol l}^{-1}$  3-isobutyl-1-methylxanthine (IBMX). After a 10 min incubation of *Drosophila* body wall muscles in  $0.01$ ,  $0.1$  or  $1 \mu\text{mol l}^{-1}$  DPKQDFMRamide in the presence of  $0.5 \text{ mmol l}^{-1}$  IBMX, cAMP levels did not exceed the cAMP level observed after incubation in  $0.5 \text{ mmol l}^{-1}$  IBMX alone (one-way ANOVA, Tamhane's *post hoc*,  $P>0.05$ ). (B) Jointly,  $0.05 \text{ mmol l}^{-1}$  forskolin and  $0.5 \text{ mmol l}^{-1}$  IBMX increased larval body wall muscle cAMP concentration by ~2.3 times the level reached with  $0.05 \text{ mmol l}^{-1}$  forskolin alone (one-way ANOVA, Tamhane's *post hoc*,  $**P<0.01$ ). Numbers in parentheses indicate the number of preparations.

*hoc*,  $P<0.01$ ), but it increased cAMP by 650% in the presence of  $0.5 \text{ mmol l}^{-1}$  IBMX, representing a 2.3-fold increase in forskolin's effectiveness (one-way ANOVA, Tamhane's *post hoc*,  $P<0.01$ ). Thus, the concentration of IBMX should have been sufficient to act synergistically with other cAMP-elevating compounds to increase cAMP levels.

The effect of the peptide on cGMP levels was also determined (Fig. 7). One-way ANOVA revealed a significant difference in cGMP levels between treatment groups ( $P<0.01$ ). IBMX ( $0.5 \text{ mmol l}^{-1}$ ) increased cGMP levels by 260% compared with saline (one-way ANOVA, Tamhane's *post hoc*,  $P<0.01$ ). Treatment with  $0.01$ ,  $0.1$  and  $1 \mu\text{mol l}^{-1}$  DPKQDFMRamide in the presence of IBMX, however,

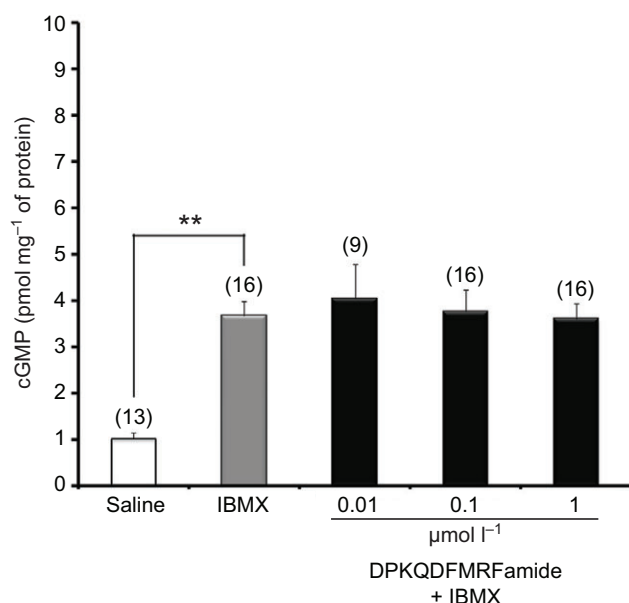

**Fig. 7. DPKQDFMRamide does not increase cGMP levels in *Drosophila* body wall muscles.** The cGMP levels measured in *Drosophila* body wall muscles that were incubated simultaneously in DPKQDFMRamide (0.01, 0.1 or 1  $\mu\text{mol l}^{-1}$ ) and 0.5  $\text{mmol l}^{-1}$  IBMX for 10 min did not exceed the cGMP level observed after the muscles were incubated in 0.5  $\text{mmol l}^{-1}$  IBMX alone. Numbers in parentheses indicate the number of preparations. \*\* $P < 0.01$ .

did not change cGMP from the level observed in IBMX alone (Tamhane's *post hoc*,  $P > 0.05$ ). These data suggest that cGMP does not play a role in mediating the peptide's effects on muscle tonus.

To further investigate a possible role of cyclic nucleotide signal transduction pathways, we determined whether selective pharmacological agents would mimic the ability of DPKQDFMRamide to induce contractions. Treatment with IBMX for 10 min had no significant effect on muscle tonus ( $1.1 \pm 7.3 \mu\text{N}$ ,  $N=7$ ). Treatment with 50  $\mu\text{mol l}^{-1}$  forskolin for 10 min appeared to cause a small change in tonus ( $11.6 \pm 4.7 \mu\text{N}$ ,  $n=7$ ), but this change was just at the threshold level for discernible effects reported previously ( $\sim 10 \mu\text{N}$ ) (Clark et al., 2008). This apparent effect of forskolin was substantially weaker than the effect of 1  $\mu\text{mol l}^{-1}$  DPKQDFMRamide (Fig. 8A), despite the fact that forskolin increased cAMP levels at this concentration and DPKQDFMRamide did not (Fig. 6).

If the peptide were to act by increasing cAMP or cGMP levels, its effectiveness should be enhanced by slowing hydrolysis of the cyclic nucleotide monophosphates with IBMX, particularly at threshold concentrations of the peptide, where cAMP and cGMP have not reached maximal levels. When DPKQDFMRamide was applied at the threshold concentration for eliciting contractions ( $\sim 0.01 \mu\text{mol l}^{-1}$ ) (Clark et al., 2008), its effectiveness was not significantly increased by the presence of 0.5  $\text{mmol l}^{-1}$  IBMX (Fig. 6A, *t*-test  $P > 0.05$ ). Inhibitors of the cAMP-dependent protein kinase (Rp-cAMPS) and the cGMP-dependent protein kinase (Rp-8-pCPT-cGMPS) did not significantly alter the amplitude of contractions elicited by 1  $\mu\text{mol l}^{-1}$  DPKQDFMRamide (Fig. 8B, *t*-test,  $P > 0.05$ ). Thus, the results do not support a role for cAMP, cGMP or their target kinase enzymes in mediating peptide-induced contractions.

#### Arachidonic acid

To determine whether the myogenic effects of DPKQDFMRamide might result from the involvement of signalling pathways mediated

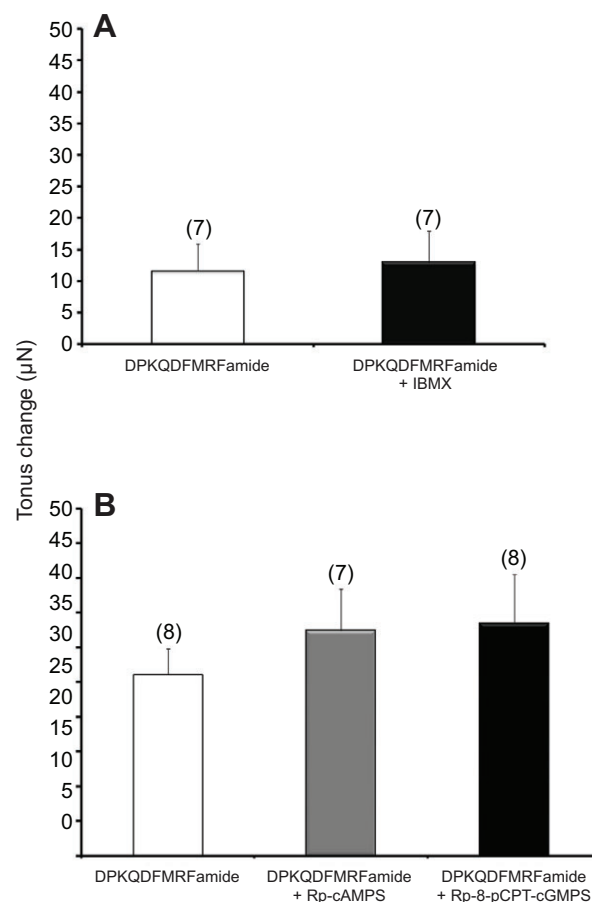

**Fig. 8. cAMP and cGMP do not mediate peptide-induced contractions.**

The application of 0.5  $\text{mmol l}^{-1}$  IBMX, a broad-spectrum phosphodiesterase inhibitor (A) and 100  $\mu\text{mol l}^{-1}$  Rp-cAMPS and 10  $\mu\text{mol l}^{-1}$  Rp-8-pCPT-cGMPS, selective cAMP- and cGMP-dependent protein kinase inhibitors (B), had no effect on the ability of DPKQDFMRamide (A, 0.01  $\mu\text{mol l}^{-1}$ ; B, 1  $\mu\text{mol l}^{-1}$ ) to induce contractions in *Drosophila* body wall muscles (*t*-test for independent samples,  $P > 0.05$ ). Numbers in parentheses indicate the number of preparations.

by arachidonic acid, we perfused third-instar larvae with arachidonic acid at concentrations ranging from  $10^{-10}$  to  $10^{-4} \text{mol l}^{-1}$  and looked for changes in muscle tonus that might mimic the effect of the peptide. No significant change in tonus was observed at any of the concentrations tested ( $N=7-10$  preparations for each concentration;  $9.3 \pm 11.8 \mu\text{N}$  at  $10^{-4} \text{mol l}^{-1}$ ).

#### Pertussis toxin

After determining that the various second messengers above are not involved in mediating the effects of DPKQDFMRamide on muscle fibres, one possible explanation is a direct G-protein interaction. To examine this possibility, we incubated dissected third-instar tissue with an inhibitor of GPCR subunit uncoupling, pertussis toxin (PTX) (Fig. 9). Incubation with 500  $\text{ng ml}^{-1}$  PTX for 20 min resulted in a significant reduction in muscle responsiveness to exogenously applied DPKQDFMRamide (PTX:  $4.6 \pm 0.5$ , heat-inactivated PTX:  $19.3 \pm 3.3$ ; Mann–Whitney rank sum,  $P=0.002$ ).

#### Membrane potential

To determine whether DPKQDFMRamide application leads to changes in membrane potential, we assessed over 300 intracellular recordings and found that the peptide does not produce any



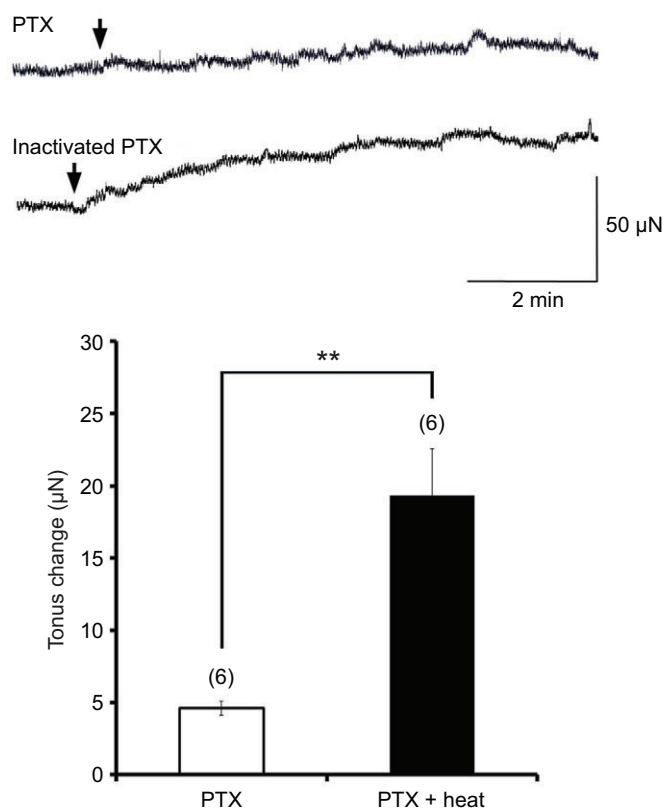

**Fig. 9. Incubation of third-instar tissue with PTX, a G-protein-coupled receptor (GPCR) inhibitor, greatly reduced the ability of DPKQDFMRamide to induce changes in muscle tonus.** The top trace shows that the effect of DPKQDFMRamide on body wall muscle is greatly reduced in the presence of PTX ( $500 \text{ ng ml}^{-1}$ ). The bottom trace shows that heat-inactivated PTX does not attenuate the effect of the peptide. Downward arrow indicates when  $1 \mu\text{mol l}^{-1}$  DPKQDFMRamide was added. The average muscle tonus change demonstrates that incubating tissue with PTX significantly reduces the ability of DPKQDFMRamide to induce changes in muscle tonus (Mann–Whitney rank sum test,  $**P < 0.01$ ).

significant change in membrane voltage (control  $-41.3 \pm 1.3 \text{ mV}$ , peptide  $-43.6 \pm 1.9 \text{ mV}$ ,  $P > 0.05$ ).

## DISCUSSION

The present investigation provides evidence that the *Drosophila* FMRFamide, DPKQDFMRamide, elicits contractions in larval muscle fibres via the GPCR FR. Peptide-induced contractions were reduced by 70–90% in heterozygous larvae in which RNAi reduces expression of the *FR* gene either in all cells or specifically in muscle cells. No reduction in peptide-induced contractions, however, was observed in larvae with reduced *FR* expression only in neurons. These observations confirm earlier work (Clark et al., 2008) indicating that DPKQDFMRamide induces contractions via a direct action on larval muscle fibres.

Although peptide-induced contractions were reduced dramatically in larvae with reduced *FR* expression ubiquitously or in muscle, such contractions were not completely abolished. At least two possibilities could account for this result. First, the larvae used for physiological recordings were heterozygous for the *GAL4* and *UAS-RNAi* element, which would make it plausible that larval cells retained sufficient expression of the dFMRFamide receptor to mediate a weak response to the peptide. We assessed this possibility through qPCR. In ubiquitous *FR* knock-down lines, a 70% reduction

in responsiveness to DPKQDFMRamide corresponded to a 90% reduction in expression, and in muscle-specific *FR* knock-down lines an 85% reduction in peptide responsiveness corresponded to a 70% reduction in expression. However, qPCR results are not a direct measure of protein expression levels, which we did not assess. Thus, in both cases the lack of a complete reduction in responsiveness to exogenous application of DPKQDFMRamide correlates with incomplete inhibition of *FR* expression. An alternative possibility is that DPKQDFMRamide may act via targets other than the FMRFamide receptor. Johnson et al. (Johnson et al., 2003) showed that  $100 \text{ nmol l}^{-1}$  DPKQDFMRamide elicits effects that are mediated by both the FMRFamide receptor and a myosuppressin receptor when expressed in Human embryonic kidney (HEK) cells. The FMRFamide receptor (*FR*) and the myosuppressin receptor (*DmsR-2*) are also necessary for DPKQDFMRamide to enhance transmitter release from synaptic terminals (Klose et al., 2010). None of the *DmsR* knock-down lines, however, showed any change in responsiveness to DPKQDFMRFa compared with controls (Fig. 3) despite the reduction in gene expression, which was as high as a 62% reduction in lines where the RNAi was expressed ubiquitously. Thus, it is unlikely that the myogenic effects of DPKQDFMRamide are mediated through the myosuppressin receptors.

Although earlier work demonstrated a role for CaMKII in modulating transmitter release in *Drosophila* larvae by DPKQDFMRamide (Dunn and Mercier, 2005; Klose et al., 2010), data reported here indicate that CaMKII activity is not necessary for the peptide to induce muscle contraction. The requirement of different intracellular pathways for these two physiological responses indicates that they are distinct and strengthens the interpretation that the peptide's ability to induce contractions represents a direct effect on muscle fibres rather than some presynaptic effect, such as an increase in spontaneous release of neurotransmitters. In the context of earlier work, the current findings indicate that postsynaptic and presynaptic effects of one modulatory substance may be mediated by different intracellular signalling pathways and by different receptor combinations.

Heat-shock treatment potentiated contractions elicited by DPKQDFMRamide in *ala1* and *UAS-ala1* larvae by ~150% and 100%, respectively. The reason for such potentiation is not clear but probably involves an increase in intracellular calcium levels in the muscle fibres. Warming *Drosophila* larval salivary gland cells to  $35^\circ\text{C}$  increases intracellular  $\text{Ca}^{2+}$  concentration 10-fold, with a slow recovery of  $[\text{Ca}^{2+}]_i$ , starting ~45 min after the temperature had cooled to  $25^\circ\text{C}$  (Drummond et al., 1986). If heat shock has a similar effect in muscle cells, an increase in intracellular  $\text{Ca}^{2+}$  might last long enough to augment the response to the peptide. Alternatively, a substantial rise in  $[\text{Ca}^{2+}]_i$  might activate intracellular processes that potentiate peptide-induced contractions even after  $\text{Ca}^{2+}$  levels have subsided.

Our observation that DPKQDFMRamide-induced contractions were not impaired in the  $\text{IP}_3$  receptor mutant (*Itp-r83A<sup>05616/+</sup>*) suggests that this receptor may not be required for the increase in muscle tonus. There is only one  $\text{IP}_3$  receptor-encoding gene in *Drosophila*, and larvae of this particular mutant were shown to exhibit a 50% reduction in *itpr-83* mRNA levels compared with wild-type larvae (Klose et al., 2010). Such a reduction in expression was sufficient to abolish the ability of DPKQDFMRamide to enhance peak  $\text{Ca}^{2+}$  levels in presynaptic terminals and excitatory junction potential amplitude. The present observations indicate that postsynaptic induction of muscle contraction does not exhibit the same dependence on the  $\text{IP}_3$  receptor as the presynaptic effects for



this neuropeptide. As the IP<sub>3</sub> receptor mutant still expresses 50% of the normal level of *itpr-83* mRNA, we cannot completely rule out the involvement of this receptor.

DPKQDFMRamide-induced contractions were neither impaired nor potentiated in four PLC mutant fly lines, each containing a different mutation. Although there are several PLC types, only PLC- $\beta$  is activated by a GPCR (Vauquelin and von Mentzer, 2007). In *D. melanogaster* two genes, *norpA* and *Plc-21c*, encode PLC- $\beta$ . The *norpA* mutants exhibit a 97–99% reduction in PLC activity compared with control flies, as determined by *in vitro* PLC assays of eye and whole-head homogenates (Inoue et al., 1988; Pearn et al., 1996). Unfortunately, the level of PLC activity in tissues of *Plc-21c* mutants is unknown. The lack of impairment in peptide-induced contractions in any of the *norpA* mutants, however, suggests that PLC is probably not required for the postsynaptic response. This would suggest that DPKQDFMRamide does not initiate muscle contractions by PLC-dependent mechanisms, such as generation of diacylglycerol and IP<sub>3</sub>.

Several lines of evidence presented in this study suggest that cAMP, cGMP and their respective protein kinase enzymes are not required for DPKQDFMRamide to increase muscle tonus in *Drosophila* larvae. First, the peptide did not increase cAMP or cGMP levels in *Drosophila* larval muscles in the presence of the phosphodiesterase inhibitor IBMX. Second, IBMX failed to potentiate the peptide's effect on muscle contraction. Third, neither IBMX nor forskolin mimicked the peptide's effect on muscle tonus very well. IBMX had no effect on muscle contraction, despite its ability to increase cGMP levels by 260%. The contractions elicited by 50  $\mu\text{mol l}^{-1}$  forskolin were much smaller than those elicited by DPKQDFMRamide, despite the fact that forskolin increased cAMP levels by 230% and the peptide did not alter cAMP significantly. Fourth, inhibitors of cAMP-dependent and cGMP-dependent protein kinases failed to reduce peptide-induced contractions. These observations suggest very strongly that changes in the concentration of cAMP or cGMP are not necessary to mediate the peptide's ability to increase muscle tonus. This would differentiate the peptide-induced contractions in *Drosophila* larval muscles from the effects of several neuropeptides (Bishop et al., 1991; Bishop et al., 1987; Erxleben et al., 1995; Nykamp and Lange, 2000; Trim et al., 1998) and biogenic amines (Clark and Lange, 2003; Knotz and Mercier, 1995; Nykamp and Lange, 2000) that are reported to modulate contraction of invertebrate muscles via cAMP.

In our efforts to illuminate the putative second messenger cascade initiated by the activation of the *Drosophila* FR, we also examined the effects of arachidonic acid, which failed to elicit changes in tonus at concentrations ranging from  $10^{-10}$  to  $10^{-4}$  mol  $\text{l}^{-1}$ . This is not surprising as two previous reports provide evidence that arachidonic acid may not be present or utilized in *Drosophila* (Chyb et al., 1999; Yoshioka et al., 1985). Thus, it is unlikely that DPKQDFMRamide mediates its effects through pathways utilizing arachidonic acid.

Overall, the current results confirm that DPKQDFMRamide increases muscle tonus in *Drosophila* larval muscles by acting directly on the muscle fibres via at least one GPCR. The mechanisms underlying this modulatory effect are still not known but do not appear to involve CaMKII, PLC, cAMP, cGMP or arachidonic acid. We have not completely ruled out involvement of the IP<sub>3</sub> receptor, but the data presented here suggest this is unlikely. Other second messengers, such as linoleic acid, have not been examined. The ability of PTX to reduce peptide-induced contractions (Fig. 9) suggests that the FR acts on a G-protein of G<sub>i/o</sub>

type (Li et al., 1995). G-protein sub-units have been reported to act directly without the involvement of second messengers in other systems (e.g. Dascal, 2001; Jiang and Bajpayee, 2009; Soejima and Noma, 1984; Wickman et al., 1994). As DPKQDFMRamide-induced contractions are completely abolished by nifedipine and nicardipine and by lowering extracellular Ca<sup>2+</sup> concentration (Clark et al., 2008), they appear to require Ca<sup>2+</sup> influx through L-type channels associated with the sarcolemma, which have been shown to be present in body wall muscles of *Drosophila* larvae (Gielow et al., 1995). A similar dependence on extracellular Ca<sup>2+</sup> and L-type channels has been reported for peptide-induced contractions in other arthropod muscles (Donini and Lange, 2002; Kravitz et al., 1980; Lange et al., 1987; Quigley and Mercier, 1997; Wilcox and Lange, 1995). One possible model is that DPKQDFMRamide activates the PTX-sensitive G-protein, whose subunits act directly on the L-type channels to elicit Ca<sup>2+</sup> influx, possibly shifting their activation voltage. Peptide-induced Ca<sup>2+</sup> influx would induce contraction via calcium-induced release of calcium from the sarcoplasmic reticulum (Sullivan et al., 2000; Peron et al., 2009; Ushio et al., 1993). G $\beta\gamma$  subunits have been shown to act directly on N-, P/Q-, R- and T-type calcium channels (Herlitze et al., 1996; Ikeda, 1996; Wolfe et al., 2003) but they inhibit these channels rather than excite them. Furthermore, there is no evidence that L-type channels are modulated directly by G-protein subunits. Alternatively, the peptide might act downstream of calcium, possibly by reducing its re-uptake into the sarcoplasmic reticulum or by changing the sensitivity of the contractile proteins to calcium.

## MATERIALS AND METHODS

### Fly stocks

Canton S (CS) flies, obtained from Bloomington *Drosophila* Stock Center (BDSC) were used for the experiments unless otherwise indicated.

The IP<sub>3</sub> receptor mutant *Itp-r83A*<sup>05616</sup> {P{PZ}Itp-r83A<sup>05616</sup>Nmdar1<sup>05616</sup>ry<sup>506</sup>TM3, ry<sup>RK</sup>Sb<sup>1</sup>Ser<sup>1</sup>} (Spradling et al., 1999), was obtained from BDSC. As this mutation was balanced over a Sb<sup>1</sup>Ser<sup>1</sup> dominantly marked balancer chromosome, a genetic cross scheme was performed to remove the balancer. First, a cross between the IP<sub>3</sub> mutant receptor line and a Ser<sup>1</sup> balancer line (BDSC) was performed. The progeny line was further crossed with w<sup>1118</sup> flies (BDSC) to remove the marked balancer chromosome.

Four fly lines with mutations in two genes encoding PLC $\beta$  were used. Three were mutants of the *norpA* (*no receptor potential*) gene: w<sup>\*</sup>*norpA*<sup>33</sup>, w<sup>\*</sup>*norpA*<sup>36</sup> and *norpA*<sup>7</sup> (BDSC). As the *norpA* mutants originated from Oregon R fly stocks, wild-type Oregon R was used as a control. The *Plc21c* gene mutation line and its control line were from BDSC.

To investigate the role of CaMKII, we used an *ala1* transgenic line containing a synthetically generated alanine inhibitory peptide gene on the first chromosome under the control of a heat-shock promoter (Griffith et al., 1993). The UAS-*ala1* line contains an alanine inhibitory peptide gene inserted downstream of the UAS and was used as a control for the *ala1* line. Both transgenic lines were gifts from Dr Leslie Griffith (Brandeis University, Waltham, MA, USA). Additionally, we used a commercially available *ala1* line containing the inhibitory peptide for CaMKII under UAS control which we crossed with the muscle-specific driver 24B.

A transgenic line containing the FMRamide receptor inverted repeat (*FR-IR*) downstream UAS was obtained from the Vienna *Drosophila* RNAi Center (VDRC no. 9594). The generation of this line (UAS-*FR RNAi*) was described previously (Dietzl et al., 2007). Briefly, an FMRamide receptor gene fragment was cloned as a 301 bp long inverted repeat (IR) in antisense–sense orientation into a modified pUAST vector, pMF3, with multiple UAS sites. This cloned construct was then inserted on the second chromosome of an isogenic w<sup>1118</sup> host, generating a homozygous viable UAS-*FR RNAi* line. Two transgene lines containing inverted repeats downstream of UAS for the *Drosophila* myosuppressin receptors 1 and 2 (*DmsR-1* and *DmsR-2*) were obtained from the Vienna *Drosophila* RNAi Center (VDRC nos 9369 and 49952).

The following driver lines were used to express the RNAi for *FR*, *DmsR-1* and *DmsR-2*: *elav-GAL4* (BDSC), *24B-GAL4* (BDSC) and *tubP-GAL4* (BDSC). We used *elav-GAL4* for pan-neuronal expression of the *UAS-FR-IR* transgene (Luo et al., 1994; Sink et al., 2001). *24B-GAL4* (Luo et al., 1994; Brand and Perrimon, 1993) was used to express *UAS-FR-IR* in all larval somatic muscles (Schuster et al., 1996). *tubP-GAL4* is an insert on the third chromosome that is balanced over *TM3*, *Sb* and allows for ubiquitous expression of Gal4 (Lee and Luo, 1999).

All flies were raised on a cornmeal-based medium (Boreal Laboratories Ltd, St Catharines, ON, Canada), supplemented with dry yeast, at 21°C on a 12 h:12 h light:dark cycle.

Fly crosses

Tissue-specific expression of the *UAS-FR* IR construct was driven using the *UAS/GAL4* system as described elsewhere (Brand and Perrimon, 1993). To express the *UAS-FR* IR construct ubiquitously, homozygous *UAS-FR* RNAi virgin females were crossed to *tubP-GAL4* males that were previously balanced. In addition, balanced *tubP-GAL4* males were crossed with *w<sup>1118</sup>* virgin females to remove the balancer chromosome and generate a heterozygous control line (+/+; *tubP-GAL4*/+). Expression of the *UAS-FR* IR construct in muscle and neuronal tissues was accomplished by crossing homozygous *UAS-FR* RNAi virgin females to homozygous *24B-GAL4* and *elav-GAL4* males, respectively. Heterozygous larvae of the F1 generation were used for the experiments. To generate appropriate heterozygous Gal4 controls, homozygous *elav-GAL4* and *24B-GAL4* males were crossed to *w<sup>1118</sup>* virgin female flies. To generate appropriate control larvae with the non-activated *UAS-FR* construct, homozygous *UAS-FR* RNAi virgin females were mated to *w<sup>1118</sup>* virgin female flies. The same approach was used for the expression of *UAS-DmsR-1* IR and *UAS DmsR-2* IR. All progeny and parent lines were kept at 27°C on a 12 h:12 h light:dark cycle.

RT-qPCR

Knockdown of RNAi-lines was assessed by RT-qPCR. Total RNA was isolated using Norgen's Total RNA Purification Kit (St Catharines, ON, Canada) and 500 ng of total RNA were reverse transcribed with iScript cDNA Synthesis Kit (Bio-Rad, Hercules, CA, USA). For real-time qPCR, SYBR Green qPCR Supermix (Invitrogen) was added to cDNA and primers. Each sample was amplified for 40 cycles in a thermocycler (Bio-Rad): 5 min at 95°C, 15 s at 95°C, 90 s at 58°C and 30 s at 72°C. The delta delta Ct (2<sup>-ΔΔCt</sup>) method was used for data analysis, with *rp49* as a house-keeping gene for data normalization. Primers used in RT-qPCR reactions are listed in Table 1.

Heat shock

The *ala1* and *UAS-ala* flies were placed in empty glass vials and transferred to a dry incubator for 1 h at 37°C. After heat shock, flies were allowed to recover at room temperature (21°C) for approximately 2 h before muscle contractions were recorded.

Dissection

Wandering stage third-instar larvae were used for all experiments. They were collected from the sides of their culture vials immediately before dissections were made. All dissections were made at room temperature (~21°C) in modified haemolymph-like (HL6) *Drosophila* physiological saline (Macleod et al., 2002). The saline contained (in mmol l<sup>-1</sup>): 23.7 NaCl, 24.8 KCl, 0.5 CaCl<sub>2</sub>, 15 MgCl<sub>2</sub>, 10 NaHCO<sub>3</sub>, 80 trehalose, 20 isethionic

acid, 5.7 L-alanine, 2.0 L-arginine, 14.5 glycine, 11.0 L-histidine, 1.7 L-methionine, 13.0 L-proline, 2.3 L-serine, 2.5 L-threonine, 1.4 L-tyrosine, 1.0 L-valine and 5 BES, pH 7.2. The saline was stored at -20°C in 200 ml aliquots.

Larvae were pinned dorsal side up at the anterior and posterior ends to a dish containing saline. They were stretched slightly longitudinally, and a mid-dorsal cut was made along the length of the animal (Fig. 1, top). The viscera were removed, and the segmental nerves were cut near the ventral ganglion, which was subsequently removed along with the brain (Jan and Jan, 1976). These preparations were used for muscle contraction recording or enzyme immunoassay.

Muscle contraction

After dissection, the pin in the anterior end of the larva was removed, and the anterior tip of the larva was hooked to a Grass FT03 tension transducer (Grass Instruments, Quincy, MA, USA) as described previously (Clark et al., 2008). Contractions were amplified using a MOD CP 122A amplifier (Grass Telefactor, West Warwick, RI, USA) and were recorded on a chart recorder. The recording dish had a volume of ~0.2–0.4 ml and was perfused continuously at a rate of 0.7 ml min<sup>-1</sup>. Excess fluid was removed by continuous suction.

cAMP and cGMP enzyme immunoassays

Dissected preparations of larval body wall muscles were placed in cold saline, and pools of two to nine larval preparations were transferred into 100 µl of desired incubation solution. Individual pools of tissues to be tested for cAMP content were incubated separately in (a) saline, (b) a non-selective phosphodiesterase inhibitor, 0.5 mmol l<sup>-1</sup> IBMX, (c) 0.5 mmol l<sup>-1</sup> IBMX containing either DPKQDFMRamide at concentrations ranging from 0.01 to 1 µmol l<sup>-1</sup> or 0.05 mmol l<sup>-1</sup> forskolin (an adenylate cyclase activator), (d) 0.5 mmol l<sup>-1</sup> IBMX containing 0.05 mmol l<sup>-1</sup> forskolin or (e) 0.05 mmol l<sup>-1</sup> forskolin alone. Preparations to be assayed for cGMP were incubated in either (a) saline alone, (b) saline containing 0.5 mmol l<sup>-1</sup> IBMX or (c) saline containing 0.5 mmol l<sup>-1</sup> IBMX with concentrations of DPKQDFMRamide ranging from 0.01 to 1 µmol l<sup>-1</sup>. All incubation solutions contained 0.25% DMSO with the exception of solutions containing forskolin, which contained 0.65% DMSO. After 10 min of incubation at room temperature, each larval pool was placed into 100 µl of 0.1 mol l<sup>-1</sup> hydrochloric acid (HCl) for 5 min to inhibit endogenous phosphodiesterase activity. To halt the chemical reactions, larvae were frozen on a steel plate cooled over dry ice, and tissue was homogenized in 500 µl of 0.1 mol l<sup>-1</sup> HCl and centrifuged for 12 min at 11,000 g. The supernatant was stored at -80°C until ready to assay. The pellet was further submitted to a protein determination assay.

Levels of cAMP or cGMP were determined in duplicate from supernatant (100 µl) following acetylation protocols for direct cAMP and cGMP enzyme immunoassay kits (Assay Designs, Ann Arbor, MI, USA). Optical densities were read at 405 nm with a BioTek Synergy HT microplate reader (BioTek, Winooski, VT, USA), and the concentrations of cAMP or cGMP (pmol ml<sup>-1</sup>) were estimated using a 4-parameter logistic curve-fitting program provided in the BioTek KC4 Software. The sensitivities of the acetylated version of the cAMP and cGMP assays were 0.037 and 25 pmol ml<sup>-1</sup>, respectively.

Each pellet was dissolved in 100 µl of 1 mol l<sup>-1</sup> NaOH and placed for 2 h into a hot waterbath (40°C). Protein content was measured from 10–15 µl of solubilized pellet with a Bio-Rad Protein Assay kit (Bradford, 1976), using BSA as a protein standard. To account for variations in the number and size of larval body wall preparations, cAMP and cGMP levels were expressed as pmol mg<sup>-1</sup> protein.

PTX

PTX was obtained from Cedarlane (Burlington, ON, Canada). Dissected third-instar larval tissue was incubated in 500 ng ml<sup>-1</sup> PTX for 20 min prior to examination of tonus. For control experiments, we heat-inactivated PTX by placing the solution in a waterbath just below boiling for 30 min.

Chemicals

The *Drosophila* peptide DPKQDFMRamide was synthesized by Cell Essentials (Boston, MA, USA) and was 98% pure as determined by reverse-

Table 1. Primers used for RT-pPCR

| Primer         | Sequence                   |
|----------------|----------------------------|
| rp49 forward   | 5' GATCGTGAAGAAGCGCAC 3'   |
| rp49 reverse   | 5' CGTCTGACAAATCTCCTTG 3'  |
| FR forward     | 5' TACGGTGGACCCATCAGC 3'   |
| FR reverse     | 5'ATGCCGAGGACACCAACG 3'    |
| DmsR-1 forward | 5' AGCACTCACCATTCTGTCCG 3' |
| DmsR-1 reverse | 5' TTGCTATTTTCCGGGGCCT 3'  |
| DmsR-2 forward | 5' TGGCTGAGAAAGCTGCGTAA 3' |
| DmsR-2 reverse | 5' GTTCACTGACCAAAACCGCC 3' |



phase HPLC. Peptide was stored at  $-20^{\circ}\text{C}$  and was dissolved in saline to yield a  $10\text{ mmol l}^{-1}$  stock solution. IBMX was purchased from Sigma-Aldrich (Oakville, ON, Canada). IBMX stock solution ( $5\text{ mmol l}^{-1}$ ) was made in 0.5% DMSO containing saline and kept at  $-20^{\circ}\text{C}$ . The DMSO concentration in the final IBMX solution used for physiological recordings did not exceed 0.05%. Forskolin, Rp-cAMPS (adenosine 3',5'-cyclic monophosphorothioate, Rp-isomer, triethylammonium salt), Rp-8-pCPT-cGMPS [guanosine 3',5'-cyclic monophosphorothioate, 8-(4-chlorophenylthio)-, Rp-isomer, triethylammonium salt] and KN-93 were obtained from Calbiochem. Forskolin and KN-93 were dissolved in 100% DMSO and stored at  $4^{\circ}\text{C}$  as stock solutions ( $12$  and  $10\text{ mmol l}^{-1}$ , respectively), which were subsequently diluted in saline to yield the desired drug concentration with final DMSO concentrations of 0.4% and 0.1%, respectively. Rp-cAMPS ( $5\text{ }\mu\text{mol l}^{-1}$ ) and Rp-8-pCPT-cGMPS ( $1\text{ }\mu\text{mol l}^{-1}$ ) were stored at  $-20^{\circ}\text{C}$  until ready to dilute in saline to yield the desired final concentration. Arachidonic acid sodium salt was purchased from Sigma-Aldrich (Oakville, ON, Canada) readily dissolved in saline. All experimental solutions were made fresh on the day of testing.

### Statistical analysis

Both one-way ANOVA and *t*-test for independent samples, unless otherwise stated, were used where appropriate to determine statistical significance, and  $P < 0.05$  was used for acceptance of statistical significance. All data are expressed as means  $\pm$  s.e.m.

### Acknowledgements

We thank Dr Satpal Singh for advice on fly line crosses.

### Competing interests

The authors declare no competing financial interests.

### Author contributions

Conception and design of experiments, interpretation of the findings published, drafting and revising the article: M.M., K.G.O., M.K.K. and A.J.M. Execution of experiments: M.M. and K.G.O.

### Funding

This work was supported by a Natural Sciences and Engineering Research Council of Canada (NSERC) Discovery Grant [grant number 46292] to A.J.M., an NSERC postgraduate scholarship to K.G.O. and Ontario Government Scholarships to M.M. and K.G.O.

### References

- Anderson, M. S., Halpern, M. E. and Keshishian, H. (1988). Identification of the neuropeptide transmitter proctolin in *Drosophila* larvae: characterization of muscle fiber-specific neuromuscular endings. *J. Neurosci.* **8**, 242-255.
- Beavo, J. A. and Reifsnnyder, D. H. (1990). Primary sequence of cyclic nucleotide phosphodiesterase isozymes and the design of selective inhibitors. *Trends Pharmacol. Sci.* **11**, 150-155.
- Beavo, J. A., Rogers, N. L., Crofford, O. B., Hardman, J. G., Sutherland, E. W. and Newman, E. V. (1970). Effects of xanthine derivatives on lipolysis and on adenosine 3',5'-monophosphate phosphodiesterase activity. *Mol. Pharmacol.* **6**, 597-603.
- Bishop, C. A., Wine, J. J., Nagy, F. and O'Shea, M. R. (1987). Physiological consequences of a peptide cotransmitter in a crayfish nerve-muscle preparation. *J. Neurosci.* **7**, 1769-1779.
- Bishop, C. A., Krouse, M. E. and Wine, J. J. (1991). Peptide cotransmitter potentiates calcium channel activity in crayfish skeletal muscle. *J. Neurosci.* **11**, 269-276.
- Bradford, M. M. (1976). A rapid and sensitive method for the quantitation of microgram quantities of protein utilizing the principle of protein-dye binding. *Anal. Biochem.* **72**, 248-254.
- Brand, A. H. and Perrimon, N. (1993). Targeted gene expression as a means of altering cell fates and generating dominant phenotypes. *Development* **118**, 401-415.
- Brody, T. and Cravchik, A. (2000). *Drosophila melanogaster* G protein-coupled receptors. *J. Cell Biol.* **150**, F83-F88.
- Cazzamali, G. and Grimmelikhuijzen, C. J. (2002). Molecular cloning and functional expression of the first insect FMRFamide receptor. *Proc. Natl. Acad. Sci. USA* **99**, 12073-12078.
- Chyb, S., Raghu, P. and Hardie, R. C. (1999). Polyunsaturated fatty acids activate the *Drosophila* light-sensitive channels TRP and TRPL. *Nature* **397**, 255-259.
- Clark, J. and Lange, A. B. (2003). Octopamine modulates spermathecal muscle contractions in *Locusta migratoria*. *J. Comp. Physiol. A* **189**, 105-114.
- Clark, J., Milakovic, M., Cull, A., Klose, M. K. and Mercier, A. J. (2008). Evidence for postsynaptic modulation of muscle contraction by a *Drosophila* neuropeptide. *Peptides* **29**, 1140-1149.
- Cottrell, G. A. (1997). The first peptide-gated ion channel. *J. Exp. Biol.* **200**, 2377-2386.
- Dascal, N. (2001). Ion-channel regulation by G proteins. *Trends Endocrinol. Metab.* **12**, 391-398.
- Dietzl, G., Chen, D., Schnorrer, F., Su, K. C., Barinova, Y., Fellner, M., Gasser, B., Kinsey, K., Oppel, S., Scheiblaue, S. et al. (2007). A genome-wide transgenic RNAi library for conditional gene inactivation in *Drosophila*. *Nature* **448**, 151-156.
- Donini, A. and Lange, A. B. (2002). The effects of crustacean cardioactive peptide on locust oviducts are calcium-dependent. *Peptides* **23**, 683-691.
- Drummond, I. A., McClure, S. A., Poenie, M., Tsien, R. Y. and Steinhardt, R. A. (1986). Large changes in intracellular pH and calcium observed during heat shock are not responsible for the induction of heat shock proteins in *Drosophila melanogaster*. *Mol. Cell. Biol.* **6**, 1767-1775.
- Dunn, T. W. and Mercier, A. J. (2005). Synaptic modulation by a *Drosophila* neuropeptide is motor neuron-specific and requires CaMKII activity. *Peptides* **26**, 269-276.
- Erxleben, C. F. J., deSantis, A. and Rathmayer, W. (1995). Effects of proctolin on contractions, membrane resistance, and non-voltage-dependent sarcolemmal ion channels in crustacean muscle fibers. *J. Neurosci.* **15**, 4356-4369.
- Falconer, S. W., Carter, A. N., Downes, C. P. and Cottrell, G. A. (1993). The neuropeptide Phe-Met-Arg-Phe-NH<sub>2</sub> (FMRFamide) increases levels of inositol 1,4,5-trisphosphate in the tentacle retractor muscle of *Helix aspersa*. *Exp. Physiol.* **78**, 757-766.
- Gielow, M. L., Gu, G.-G. and Singh, S. (1995). Resolution and pharmacological analysis of the voltage-dependent calcium channels of *Drosophila* larval muscles. *J. Neurosci.* **15**, 6085-6093.
- Gorczyca, M., Augart, C. and Budnik, V. (1993). Insulin-like receptor and insulin-like peptide are localized at neuromuscular junctions in *Drosophila*. *J. Neurosci.* **13**, 3692-3704.
- Goy, M. F. (1990). Activation of membrane guanylate cyclase by an invertebrate peptide hormone. *J. Biol. Chem.* **265**, 20220-20227.
- Griffith, L. C., Verselis, L. M., Aitken, K. M., Kyriacou, C. P., Danho, W. and Greenspan, R. J. (1993). Inhibition of calcium/calmodulin-dependent protein kinase in *Drosophila* disrupts behavioral plasticity. *Neuron* **10**, 501-509.
- Herlitze, S., Garcia, D. E., Mackie, K., Hille, B., Scheuer, T. and Catterall, W. A. (1996). Modulation of Ca<sup>2+</sup> channels by G-protein  $\beta$  subunits. *Nature* **380**, 258-262.
- Hewes, R. S. and Taghert, P. H. (2001). Neuropeptides and neuropeptide receptors in the *Drosophila melanogaster* genome. *Genome Res.* **11**, 1126-1142.
- Hewes, R. S., Snowdeal, E. C., III, Saitoe, M. and Taghert, P. H. (1998). Functional redundancy of FMRFamide-related peptides at the *Drosophila* larval neuromuscular junction. *J. Neurosci.* **18**, 7138-7151.
- Ikedo, S. R. (1996). Voltage-dependent modulation of N-type calcium channels by G-protein  $\beta$  subunits. *Nature* **380**, 255-258.
- Inoue, H., Yoshioka, T. and Hotta, Y. (1988). Membrane-associated phospholipase C of *Drosophila* retina. *J. Biochem.* **103**, 91-94.
- Jan, L. Y. and Jan, Y. N. (1976). Properties of the larval neuromuscular junction in *Drosophila melanogaster*. *J. Physiol.* **262**, 189-214.
- Jiang, M. and Bajpayee, N. S. (2009). Molecular mechanisms of G<sub>o</sub> signaling. *Neurosignals* **17**, 23-41.
- Johnson, E. C., Bohn, L. M., Barak, L. S., Birse, R. T., Nässel, D. R., Caron, M. G. and Taghert, P. H. (2003). Identification of *Drosophila* neuropeptide receptors by G protein-coupled receptors-beta-arrestin2 interactions. *J. Biol. Chem.* **278**, 52172-52178.
- Klose, M. K., Dason, J. S., Atwood, H. L., Boulianne, G. L. and Mercier, A. J. (2010). Peptide-induced modulation of synaptic transmission and escape response in *Drosophila* requires two G-protein-coupled receptors. *J. Neurosci.* **30**, 14724-14734.
- Knotz, S. and Mercier, A. J. (1995). Cyclic 3',5'-adenosine monophosphate mediates dopamine-enhanced hindgut contractions in the crayfish, *Procambarus clarkii*. *Comp. Biochem. Physiol.* **111A**, 59-64.
- Kravitz, E. A., Glusman, S., Harris-Warrick, R. M., Livingstone, M. S., Schwarz, T. and Goy, M. F. (1980). Amines and a peptide as neurohormones in lobsters: actions on neuromuscular preparations and preliminary behavioural studies. *J. Exp. Biol.* **89**, 159-175.
- Lange, A. B., Orchard, I. and Lam, W. (1987). Mode of action of proctolin on locust visceral muscle. *Arch. Insect Biochem. Physiol.* **5**, 285-295.
- Lee, T. and Luo, L. (1999). Mosaic analysis with a repressible cell marker for studies of gene function in neuronal morphogenesis. *Neuron* **22**, 451-461.
- Li, X., Mumby, S. M., Greenwood, A. and Jope, R. S. (1995). Pertussis toxin-sensitive G Protein alpha-subunits: production of monoclonal antibodies and detection of differential increases on differentiation of PC12 and LA-N-5 cells. *J. Neurochem.* **64**, 1107-1117.
- Lingueglia, E., Champigny, G., Lazdunski, M. and Barbry, P. (1995). Cloning of the amiloride-sensitive FMRFamide peptide-gated sodium channel. *Nature* **378**, 730-733.
- Luo, L., Liao, Y. J., Jan, L. Y. and Jan, Y. N. (1994). Distinct morphogenetic functions of similar small GTPases: *Drosophila* Drac1 is involved in axonal outgrowth and myoblast fusion. *Genes Dev.* **8**, 1787-1802.
- Macleod, G. T., Hegström-Wojtowicz, M., Charlton, M. P. and Atwood, H. L. (2002). Fast calcium signals in *Drosophila* motor neuron terminals. *J. Neurophysiol.* **88**, 2659-2663.
- Meeusen, T., Mertens, I., Clynen, E., Baggerman, G., Nichols, R., Nachman, R. J., Huybrechts, R., De Loof, A. and Schoofs, L. (2002). Identification in *Drosophila melanogaster* of the invertebrate G protein-coupled FMRFamide receptor. *Proc. Natl. Acad. Sci. USA* **99**, 15363-15368.

- Meeusen, T., Mertens, I., De Loof, A. and Schoofs, L. (2003). G protein-coupled receptors in invertebrates: a state of the art. *Int. Rev. Cytol.* **230**, 189-261.
- Mercier, A. J., Doucet, D. and Retnakaran, A. (2007). Molecular physiology of crustacean and insect neuropeptides. *J. Pestic. Sci.* **32**, 345-359.
- Monastirioti, M., Gorczyca, M., Rapus, J., Eckert, M., White, K. and Budnik, V. (1995). Octopamine immunoreactivity in the fruit fly *Drosophila melanogaster*. *J. Comp. Neurol.* **356**, 275-287.
- Nambu, J. R., Murphy-Erdosh, C., Andrews, P. C., Feistner, G. J. and Scheller, R. H. (1988). Isolation and characterization of a *Drosophila* neuropeptide gene. *Neuron* **1**, 55-61.
- Nykamp, D. A. and Lange, A. B. (2000). Interaction between octopamine and proctolin on the oviducts of *Locusta migratoria*. *J. Insect Physiol.* **46**, 809-816.
- Pearn, M. T., Randall, L. L., Shortridge, R. D. J., Burg, M. G. and Pak, W. L. (1996). Molecular, biochemical, and electrophysiological characterization of *Drosophila* norpA mutants. *J. Biol. Chem.* **271**, 4937-4945.
- Peron, S., Zordan, M. A., Magnabosco, A., Reggiani, C. and Megighian, A. (2009). From action potential to contraction: neural control and excitation-contraction coupling in larval muscles of *Drosophila*. *Comp. Biochem. Physiol.* **154A**, 173-183.
- Quigley, P. A. and Mercier, A. J. (1997). Modulation of crayfish superficial extensor muscles by a FMRFamide-related neuropeptide. *Comp. Biochem. Physiol.* **118A**, 1313-1320.
- Schneider, L. E. and Taghert, P. H. (1988). Isolation and characterization of a *Drosophila* gene that encodes multiple neuropeptides related to Phe-Met-Arg-Phe-NH<sub>2</sub> (FMRFamide). *Proc. Natl. Acad. Sci. USA* **85**, 1993-1997.
- Schuster, C. M., Davis, G. W., Fetter, R. D. and Goodman, C. S. (1996). Genetic dissection of structural and functional components of synaptic plasticity. I. Fasciclin II controls synaptic stabilization and growth. *Neuron* **17**, 641-654.
- Shortridge, R. D., Yoon, J., Lending, C. R., Bloomquist, B. T., Perdew, M. H. and Pak, W. L. (1991). A *Drosophila* phospholipase C gene that is expressed in the central nervous system. *J. Biol. Chem.* **266**, 12474-12480.
- Sink, H., Rehm, E. J., Richstone, L., Bulls, Y. M. and Goodman, C. S. (2001). sidestep encodes a target-derived attractant essential for motor axon guidance in *Drosophila*. *Cell* **105**, 57-67.
- Soejima, M. and Noma, A. (1984). Mode of regulation of the ACh-sensitive K-channel by the muscarinic receptor in rabbit atrial cells. *Pflugers Arch.* **400**, 424-431.
- Spradling, A. C., Stern, D., Beaton, A., Rhem, E. J., Lavery, T., Mozden, N., Misra, S. and Rubin, G. M. (1999). The Berkeley *Drosophila* Genome Project gene disruption project: single P-element insertions mutating 25% of vital *Drosophila* genes. *Genetics* **153**, 135-177.
- Sullivan, K. M., Scott, K., Zuker, C. S. and Rubin, G. M. (2000). The ryanodine receptor is essential for larval development in *Drosophila melanogaster*. *Proc. Natl. Acad. Sci. USA* **97**, 5942-5947.
- Trim, N., Brooman, J. E., Holden-Dye, L. and Walker, R. J. (1998). The role of cAMP in the actions of the peptide AF3 in the parasitic nematodes *Ascaris suum* and *Ascaridia galli*. *Mol. Biochem. Parasitol.* **93**, 263-271.
- Ushio, H., Watabe, S. and Iino, M. (1993). Crayfish skeletal muscle requires both influx of external Ca<sup>2+</sup> and Ca<sup>2+</sup> release from internal stores for contraction. *J. Exp. Biol.* **181**, 95-105.
- van Tol-Steye, H., Lodder, J. C., Mansvelde, H. D., Planta, R. J., van Heerikhuizen, H. and Kits, K. S. (1999). Roles of G-protein beta gamma, arachidonic acid, and phosphorylation in convergent activation of an S-like potassium conductance by dopamine, Ala-Pro-Gly-Trp-NH<sub>2</sub>, and Phe-Met-Arg-Phe-NH<sub>2</sub>. *J. Neurosci.* **19**, 3739-3751.
- Vauquelin, G. and von Mentzer, B. (2007). *G Protein-Coupled Receptors: Molecular Pharmacology From Academic Concept to Pharmaceutical Research*. Chichester, UK; Hoboken, NJ: John Wiley & Sons.
- Volterra, A. and Siegelbaum, S. A. (1988). Role of two different guanine nucleotide-binding proteins in the antagonistic modulation of the S-type K<sup>+</sup> channel by cAMP and arachidonic acid metabolites in *Aplysia* sensory neurons. *Proc. Natl. Acad. Sci. USA* **85**, 7810-7814.
- Wang, Z., Lange, A. B. and Orchard, I. (1995). Coupling of a single receptor to two different G proteins in the signal transduction of FMRFamide-related peptides. *Biochem. Biophys. Res. Commun.* **212**, 531-538.
- Wegener, C., Reinl, T., Jansch, L. and Predel, R. (2006). Direct mass spectrometric peptide profiling and fragmentation of larval peptide hormone release sites in *Drosophila melanogaster* reveals tagma-specific peptide expression and differential processing. *J. Neurochem.* **96**, 1362-1374.
- Wickman, K. D., Iñiguez-Lluhl, J. A., Davenport, P. A., Taussig, R., Krapivinsky, G. B., Linder, M. E., Gilman, A. G. and Clapham, D. E. (1994). Recombinant G-protein  $\beta$   $\gamma$ -subunits activate the muscarinic-gated atrial potassium channel. *Nature* **368**, 255-257.
- Wilcox, C. L. and Lange, A. B. (1995). Role of extracellular and intracellular calcium on proctolin-induced contractions in an insect visceral muscle. *Regul. Pept.* **56**, 49-59.
- Willoughby, D., Yeoman, M. S. and Benjamin, P. R. (1999). Inositol-1,4,5-trisphosphate and inositol-1,3,4,5-tetrakisphosphate are second messenger targets for cardioactive neuropeptides encoded on the FMRFamide gene. *J. Exp. Biol.* **202**, 2581-2593.
- Wolfe, J. T., Wang, H., Howard, J., Garrison, J. C. and Barrett, P. Q. (2003). T-type calcium channel regulation by specific G-protein betagamma subunits. *Nature* **424**, 209-213.
- Yoshioka, T., Inoue, H., Kasama, T., Seyama, Y., Nakashima, S., Nozawa, Y. and Hotta, Y. (1985). Evidence that arachidonic acid is deficient in phosphatidylinositol of *Drosophila* heads. *J. Biochem.* **98**, 657-662.
- Zhong, Y. and Peña, L. A. (1995). A novel synaptic transmission mediated by a PACAP-like neuropeptide in *Drosophila*. *Neuron* **14**, 527-536.
